# Supplementary material
Source: Royal Society of Chemistry journal article supplement (doi:10.1039/d6nj01292b)
Supplement: d6nj01292b1.pdf [file d6nj01292b1.pdf]

## Supporting Information For

### Design and Green Synthesis of Binuclear Organoselenium Compounds for Anticancer Evaluation against Human Lung and Breast Cancer

Ghazanfar Abbas <sup>a</sup>, Tanveer Hussain Bokhari <sup>a,\*</sup>, Muhammad Adnan Iqbal <sup>b,\*</sup>, Saima Rehman <sup>a</sup>,  
Akbar Ali <sup>a</sup>

<sup>a</sup> Department of Chemistry, Government College University Faisalabad, Faisalabad, 38000,  
Pakistan

<sup>b</sup> Organometallic and Coordination Chemistry Laboratory, Department of Chemistry, University of  
Agriculture Faisalabad, Faisalabad, 38000, Pakistan

\*Corresponding author: [tanveer.bokhari@yahoo.com](mailto:tanveer.bokhari@yahoo.com)  
[adnan.iqbal@uaf.edu.pk](mailto:adnan.iqbal@uaf.edu.pk)

**Main Title: Design and Green Synthesis of Organoselenium Compounds for Anticancer  
Evaluation against Human Lung and Breast Cancer**

**Table S1:** Physical appearance of binuclear salts and Selenium adducts.

| <b>Sr. No.</b> | <b>Compound</b>  | <b>Color</b> | <b>Appearance</b> |
|----------------|------------------|--------------|-------------------|
| <b>1</b>       | ML <sub>1</sub>  | yellow       | Sticky liquid     |
| <b>2</b>       | ML <sub>2</sub>  | Yellow       | Sticky liquid     |
| <b>3</b>       | ML <sub>3</sub>  | yellow       | Sticky liquid     |
| <b>4</b>       | MC <sub>1</sub>  | Brownish     | Sticky liquid     |
| <b>5</b>       | MC <sub>2</sub>  | Brownish     | Sticky liquid     |
| <b>6</b>       | MMC <sub>3</sub> | Brownish     | Sticky liquid     |

**Table S2:** Solubilities of the synthesized compounds in different solvents.

| <b>Sr. No.</b> | <b>Compound</b> | <b>Water</b> | <b>Methanol</b> | <b>DMSO</b> | <b>Chloroform</b> | <b>Dichloro-<br/>Methane</b> |
|----------------|-----------------|--------------|-----------------|-------------|-------------------|------------------------------|
| <b>1</b>       | ML <sub>1</sub> | SOH          | S               | S           | IS                | IS                           |
| <b>2</b>       | ML <sub>2</sub> | SOH          | S               | S           | IS                | IS                           |
| <b>3</b>       | ML <sub>3</sub> | SOH          | S               | S           | IS                | IS                           |
| <b>4</b>       | MC <sub>1</sub> | IS           | IS              | S           | S                 | S                            |
| <b>5</b>       | MC <sub>2</sub> | IS           | IS              | S           | S                 | S                            |
| <b>6</b>       | MC <sub>3</sub> | IS           | IS              | S           | S                 | S                            |

Where: **S**= soluble, **IS**= insoluble, **SOH**=soluble on heating

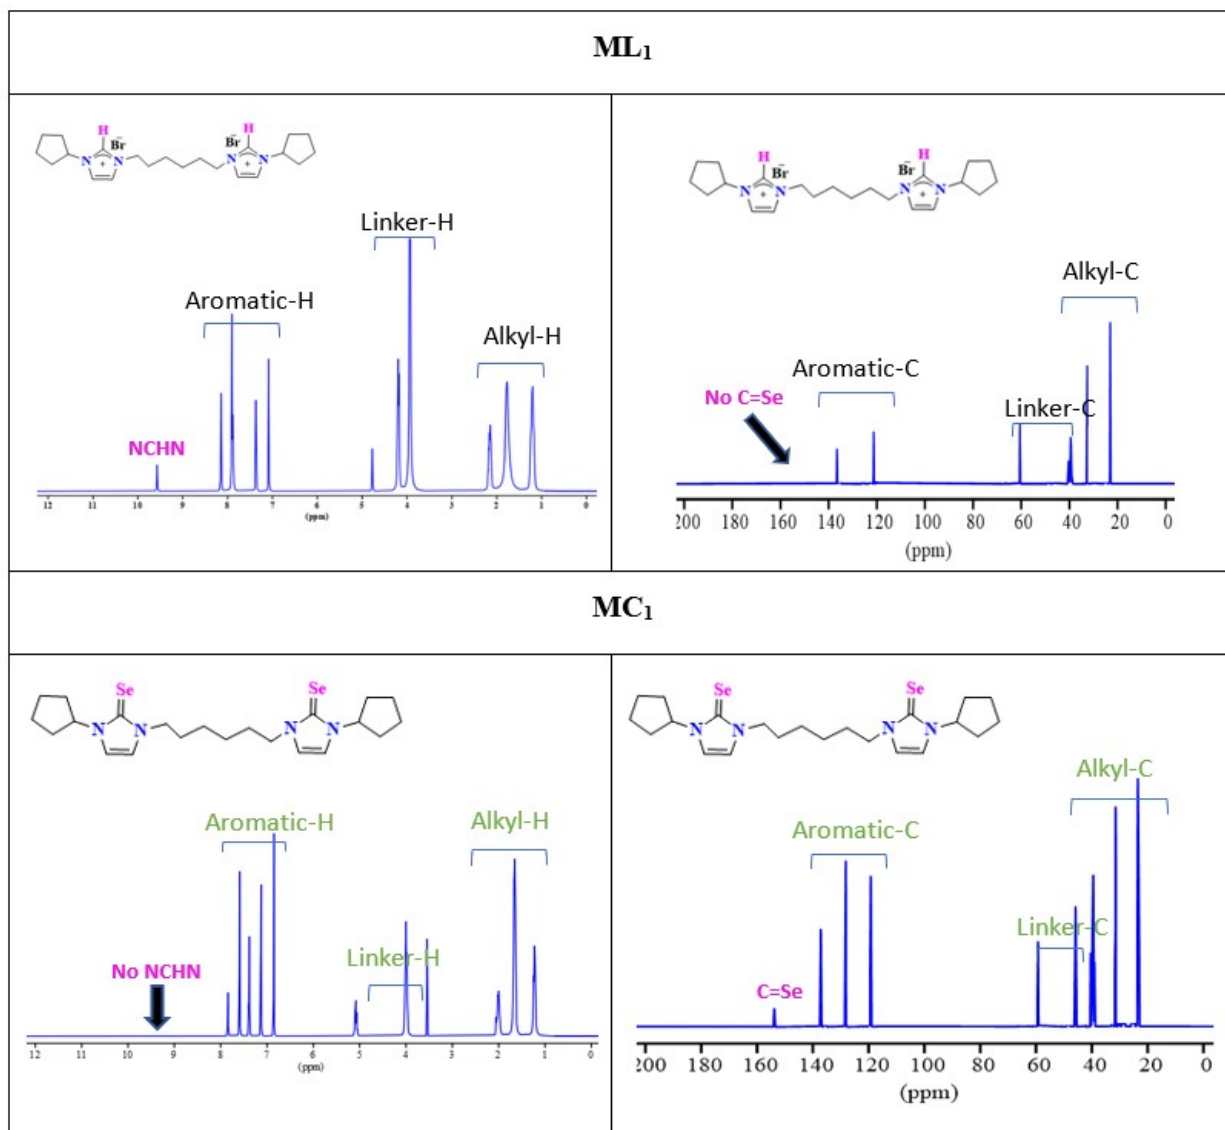

**Figure S1:** <sup>1</sup>H NMR and <sup>13</sup>C NMR spectra of ML<sub>1</sub> and MC<sub>1</sub>.

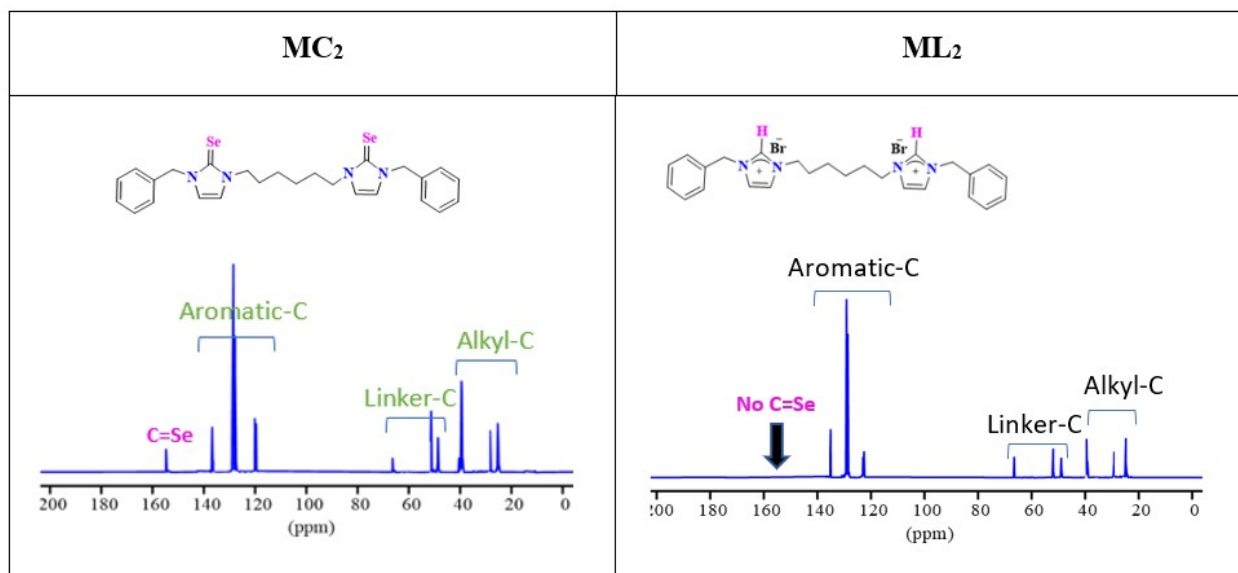

**Figure S2:** <sup>13</sup>C NMR spectra of ML<sub>2</sub> and MC<sub>2</sub>.

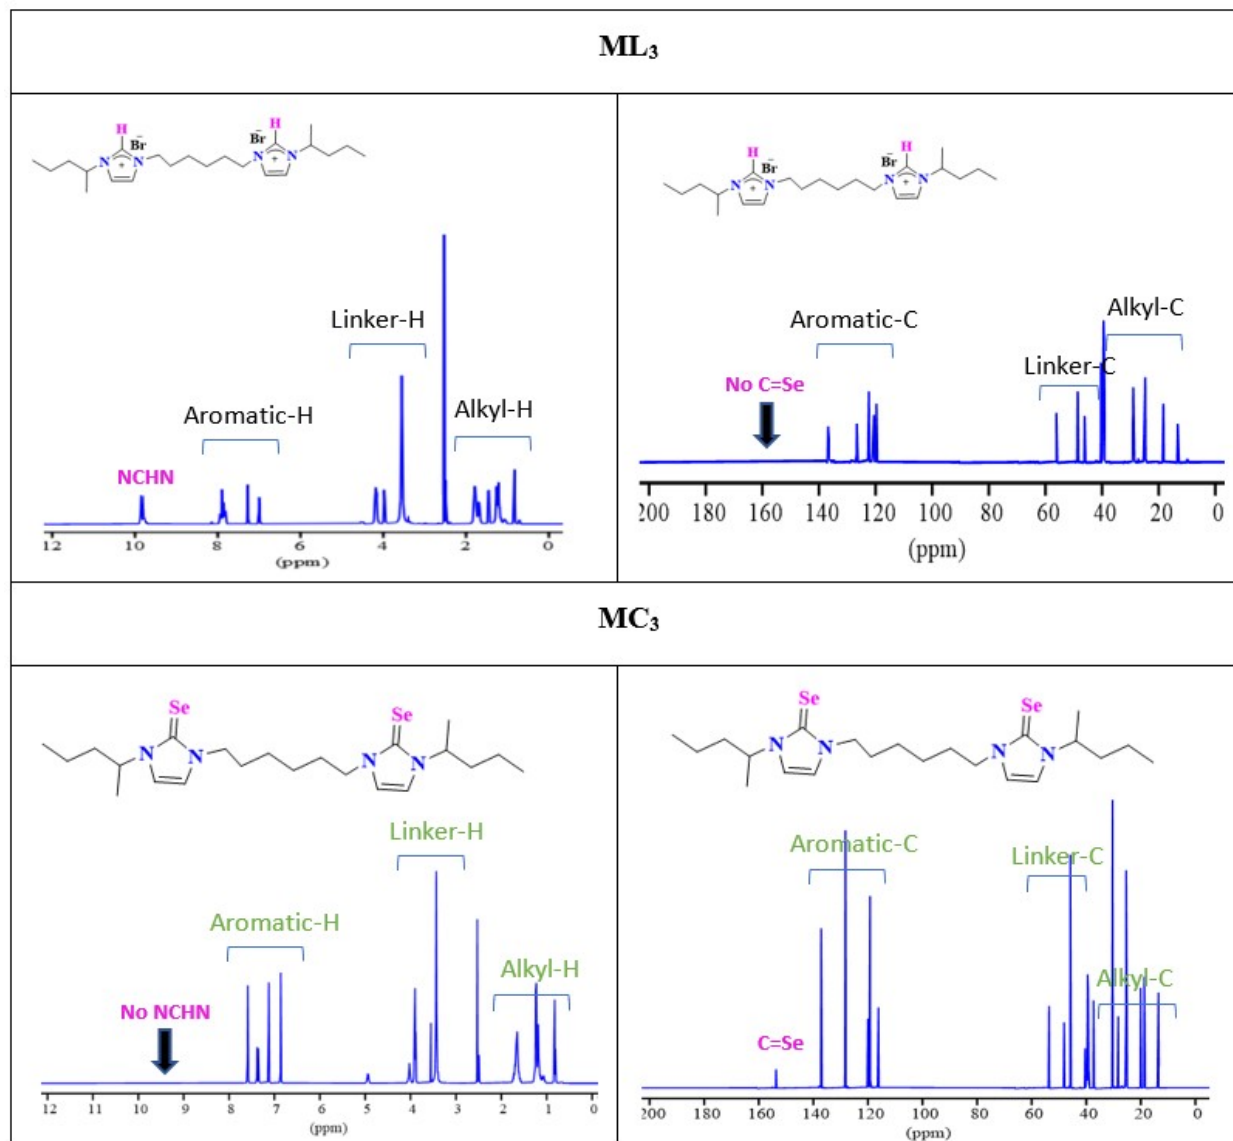

**Figure S3:** <sup>1</sup>H NMR and <sup>13</sup>C NMR spectra of **ML<sub>3</sub>** and **MC<sub>3</sub>**.

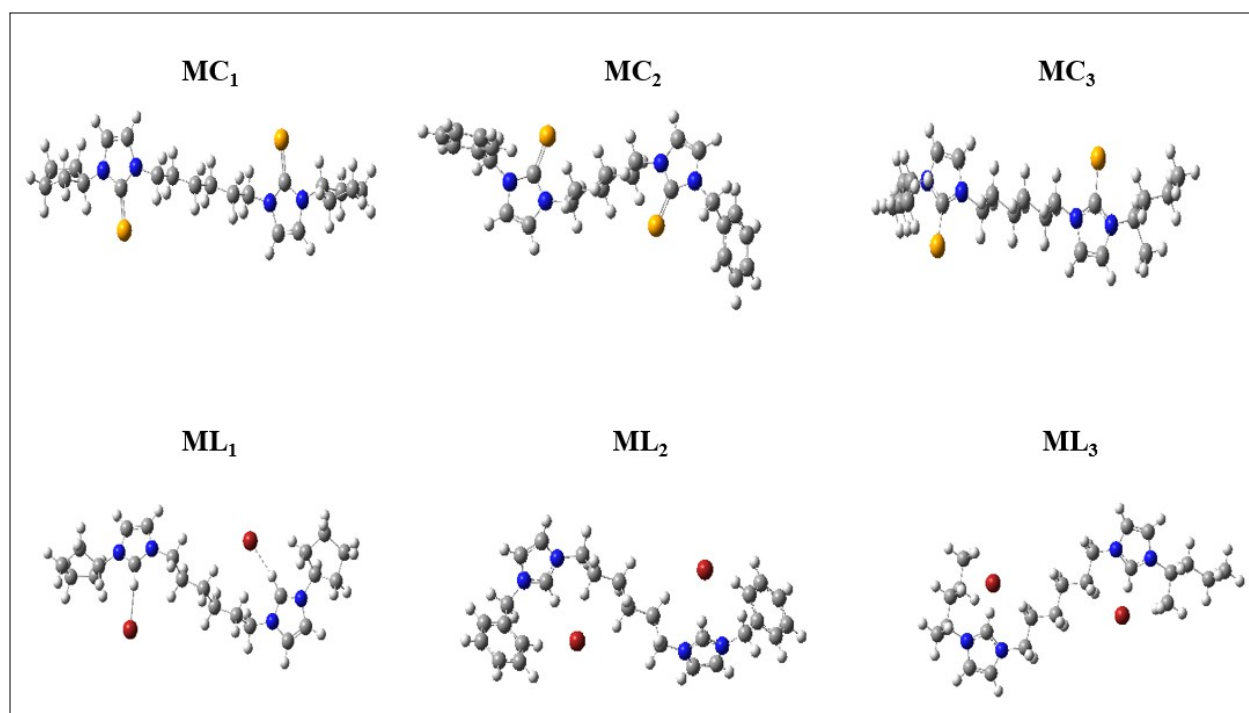

**Figure S4.** Optimized structures of ligands ( $ML_1$ - $ML_3$ ) and their respective Se-adducts ( $MC_1$ - $MC_3$ ).

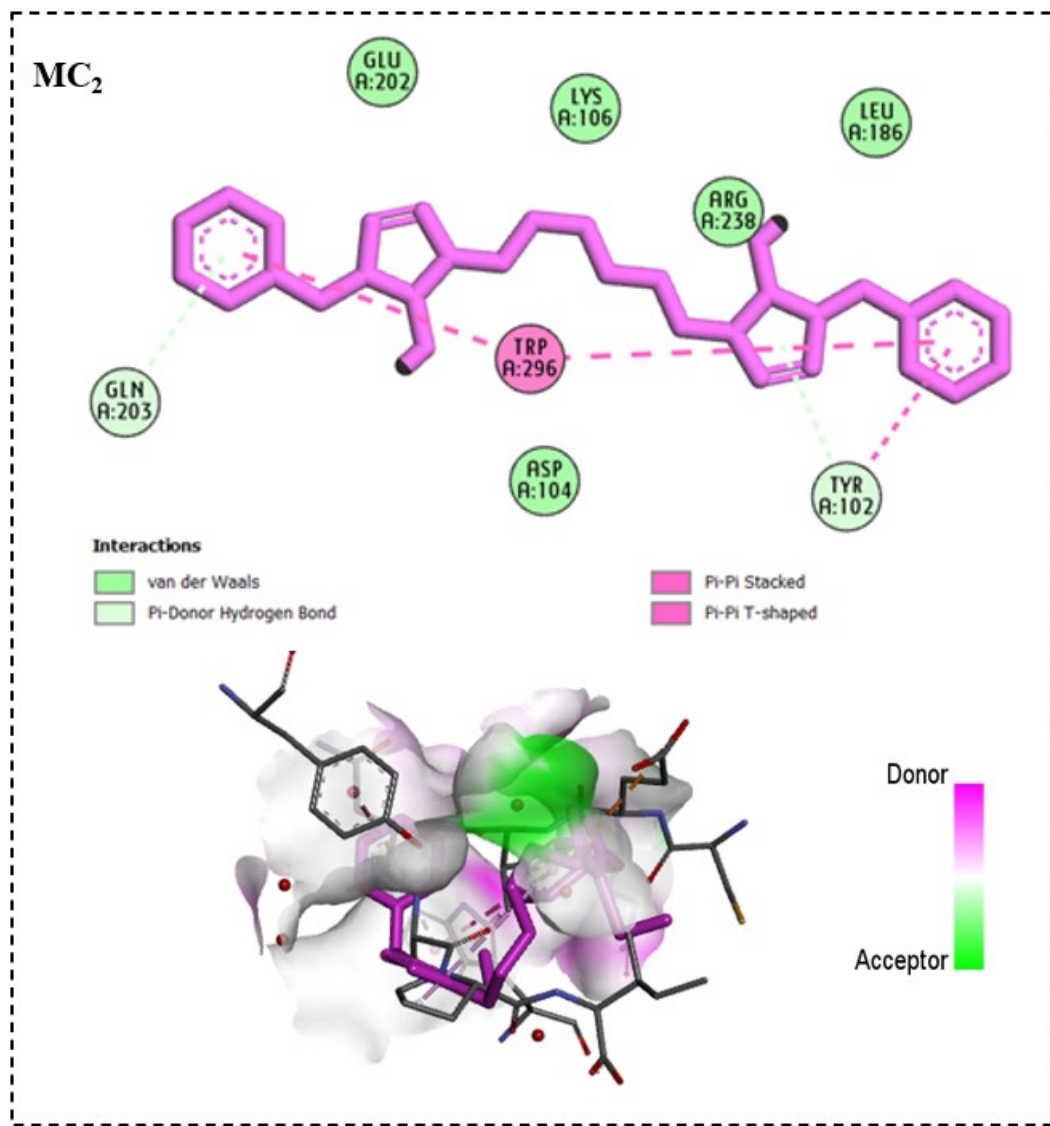

**Figure S5.** 2D and 3D view of the binding conformations of the selenium compound (**MC<sub>2</sub>**) at the active site of AKR1C2.

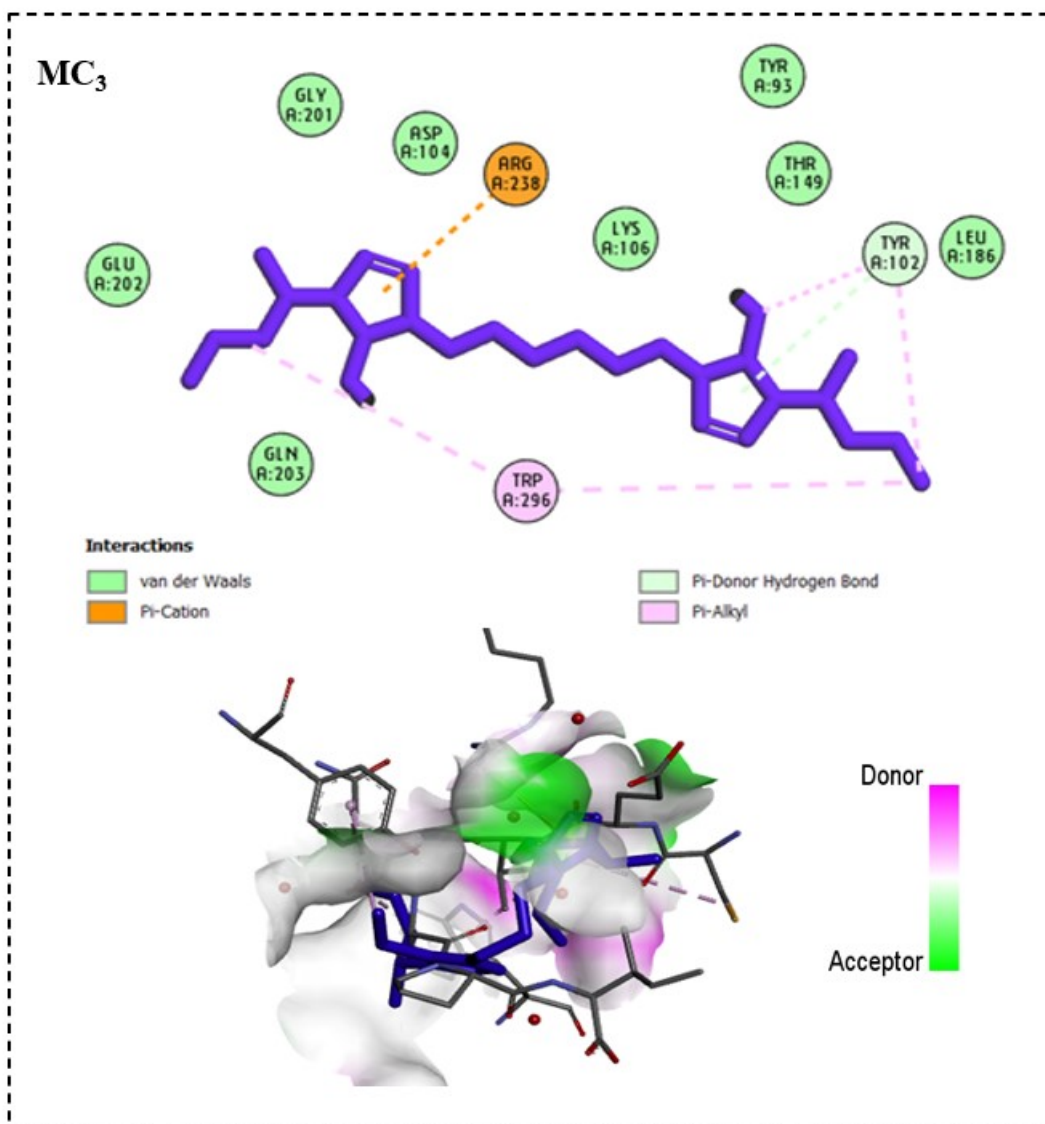

**Figure S6.** 2D and 3D view of the binding conformations of the selenium compound (**MC<sub>3</sub>**) at the active site of AKR1C2.
